# Supplementary material for: Low recombination rates and improving charge transfer as decisive conditions for high current densities and fill factors in ZnS complex systems
Source: Royal Society of Chemistry journal article supplement (doi:10.1039/d2cp00328g), 2022-01-01
Supplement: d2cp00328g1.pdf [file d2cp00328g1.pdf]

## *Electronic Supplementary Information (ESI)*

### **Low recombination rates and improving charge transfer as decisive condition to high $J_{SC}$ and FF at ZnS complex system**

Cristian Dias Fernandes,<sup>\*a</sup> Mateus Meneghetti Ferrer,<sup>a</sup> Cristiane Wienke Raubach,<sup>a</sup>  
Eduardo Ceretta Moreira,<sup>b</sup> Luciano Timm Gularte,<sup>a,c</sup> Sérgio da Silva Cava,<sup>a,d</sup> Pedro  
Lovato Gomes Jardim,<sup>d</sup> Ramon Dadalto Carvalho,<sup>d</sup> Elson Longo,<sup>e</sup> and Mario Lucio  
Moreira<sup>a,d,\*</sup>

<sup>a</sup>CCAF, IFM/CDTec-PPGCEM, Federal University of Pelotas, CEP: 96010-610, Pelotas, RS,  
Brazil.

<sup>b</sup>Federal University of Pampa, CEP: 96413-172, Bagé, RS, Brazil.

<sup>c</sup>Federal Institute of Sul-rio-grandense, CEP: 96015-360, Pelotas, RS, Brazil.

<sup>d</sup>IFM/PPGFis, Federal University of Pelotas, CEP: 96160-000, Capão do Leão, RS, Brazil.

<sup>e</sup>CDMF-UFSCar, State University of São Carlos, P.O. Box 676, São Carlos, SP

13565-905, Brazil

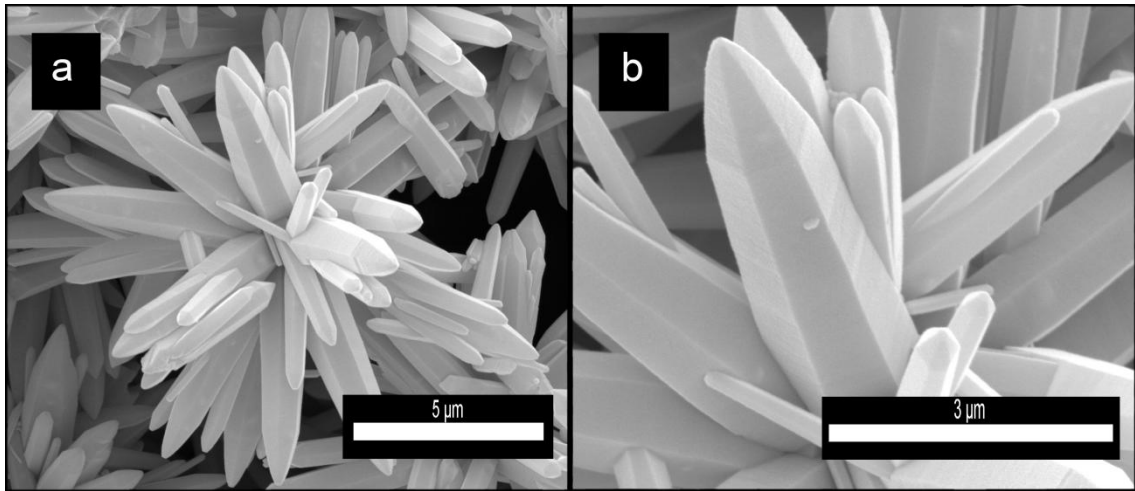

Figure S1: SEM-FEG images with magnification 20.0kX and 50.0kX of (a and b) ZnO, samples.

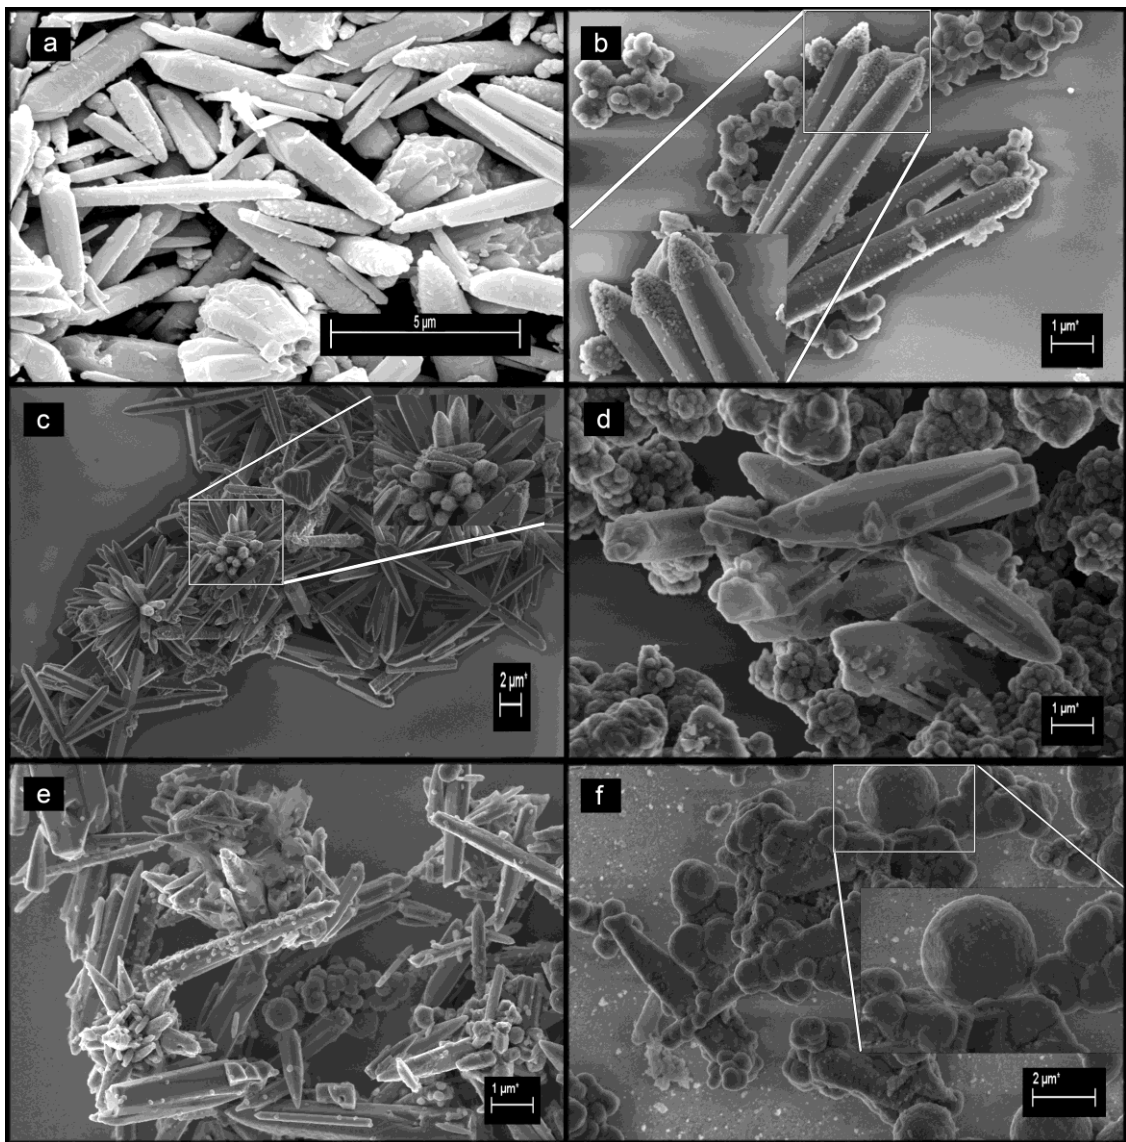

Figure S2: SEM-FEG image of the samples (a) ZnO/ZnS (ZA+TIO); (b) ZnO/ZnS (ZA+TAA); (c) ZnO/ZnS (ZN+TIO); (d) ZnO/ZnS (ZN+TAA); (e) ZnO/ZnS (ZC+TIO); and (f) ZnO/ZnS (ZC+TAA).
